# Supplementary material
Source: publisher site journal article supplement (https://www.dovepress.com/article/522808)
Supplement: Supplementary file 1 [file 522808%252509Supplementary%20material.docx]

**Supplementary Table S1** Gene targets and primer sequences used in this study for detection of antimicrobial resistance genes

and quinolone resistance-associated mutations.

| Gene | Primer sequence (5′–3′) | Amplicon size (bp) | Annealing temperature (°C) | Reference |
| --- | --- | --- | --- | --- |
| *bla*CTX-M universal | ATGTGCAGYACCAGTAARGT | 593 | 50 | [25] |
|  | TGGGTRAARTARGTSACCAGA |  |  |  |
| *bla*TEM | ATGAGTATTCAACTTTCCGTGT | 876 | 50 | [25] |
|  | TTACCAATGCTTAATCAGTGACG |  |  |  |
| *bla*SHV | CGCCGGGTTATTCTTATTTGTCGC | 1015 | 52 | [25] |
|  | TCTTTCCGATGCCGCCGCCAGTCA |  |  |  |
| *bla*OXA | ACACAATACATATCAACTTCGC | 885 | 50 | [25] |
|  | AGTGTGTTTAGAATGGTGATC |  |  |  |
| *bla*DHA | AACTTTCACAGGTGTGCTGGGT | 405 | 64 | [25] |
|  | CCGTACGCATACTGGCTTTGC |  |  |  |
| *bla*ACC | AAC AGC CTC AGC AGC CGG TTA | 346 | 64 | [25] |
|  | TTC GCC GCA ATC ATC CCT AGC |  |  |  |
| *dfrA1* | GGAGTGCCAAAGGTGAACAGC | 367 | 56 | [25] |
|  | GAGGCGAAGTCTTGGGTAAAAAC |  |  |  |
| *dfrA8* | GAGCTTCCGGGTGTTCGTGAC | 247 | 56 | [25] |
|  | CTTCCATGCCATTCTGCTCGTAGT |  |  |  |
| *dfrA14* | TTAACCCAGGATGAGAACCT | 510 | 56 | [25] |
|  | CGATTGCATAGCTTTGTTAA |  |  |  |
| *aadA1* | TGATTTGCTGGTTACGGTGAC | 284 | 50 | [25] |
|  | CGCTATGTTCTCTTGCTTTTG |  |  |  |
| *aac(6´)-Ib* | CAAAGTTAGGCATCACA | 540 | 55 | [25] |
|  | ACCTGTACAGGATGGAC |  |  |  |
| *sul1* | CTTCGATGAGAGCCGGCGGC | 437 | 50 | [25] |
|  | GCAAGGCGGAAACCCGCGCC |  |  |  |
| *sul2* | TCAACATAACCTCGGACAGT | 707 | 50 | [25] |
|  | GATGAAGTCAGCTCCACCT |  |  |  |
| *sul3* | GAGCAAGATTTTTGGAATCG | 799 | 55 | [25] |
|  | CATCTGCAGCTAACCTAGGGCTTGGA |  |  |  |
| *tetA* | GTAATTCTGAGCACTGTCGC | 956 | 50 | [25] |
|  | CTGCCTGGACAACATTGCTT |  |  |  |
| *tetB* | CTCAGTATTCCAAGCCTTTG | 416 | 50 | [25] |
|  | CTAAGCACTTGTCTCCTGTT |  |  |  |
| *tetG* | GCTCGGTGGTATCTCTGC | 500 | 55 | [25] |
|  | AGCAACAGAATCGGGAAC |  |  |  |
| *qnrA* | GATAAAGTTTTTCAGCAAGAGG | 543 | 53 | [25] |
|  | ATCCAGATCGGCAAAGGTTA |  |  |  |
| *qnrB* | GATCGTGAAAGCCAGAAAGG | 469 | 53 | [25] |
|  | ACGATGCCTGGTAGTTGTCC |  |  |  |
| *qnrS* | ATGGAAACCTACAATCATAC | 492 | 48 | [25] |
|  | AAAAACACCTCGACTTAAGT |  |  |  |
| *aac(6’)-1b-cr* | GCAACGCAAAAACAAAGTTAGG | 560 | 50 | [25] |
|  | GTGTTTGAACCATGTACA |  |  |  |
| *qepA* | CGTGTTGCTGGAGTTCTTC | 403 | 58 | [25] |
|  | CTGCAGGTACTGCGTCATG |  |  |  |
| *gyrA* | TACACCGGTCAACATTGAGG | 648 | 64 | [9] |
|  | TTAATGATTGCCGCCGTCGG |  |  |  |
| *gyrB* | TGAAATGACCCGCCGTAAAGG | 309 | 64 | [9] |
|  | GCTGTGATAACGCAGTTTGTCCGGG |  |  |  |
| *parC* | GTACGTGATCATGGACCGTG | 531 | 64 | [9] |
|  | TTCGGCTGGTCGATTAATGC |  |  |  |
| *parE* | ATGCGTGCGGCTAAAAAAGTG | 290 | 64 | [9] |
|  | TCGTCGCTGTCAGGATCGATAC |  |  |  |


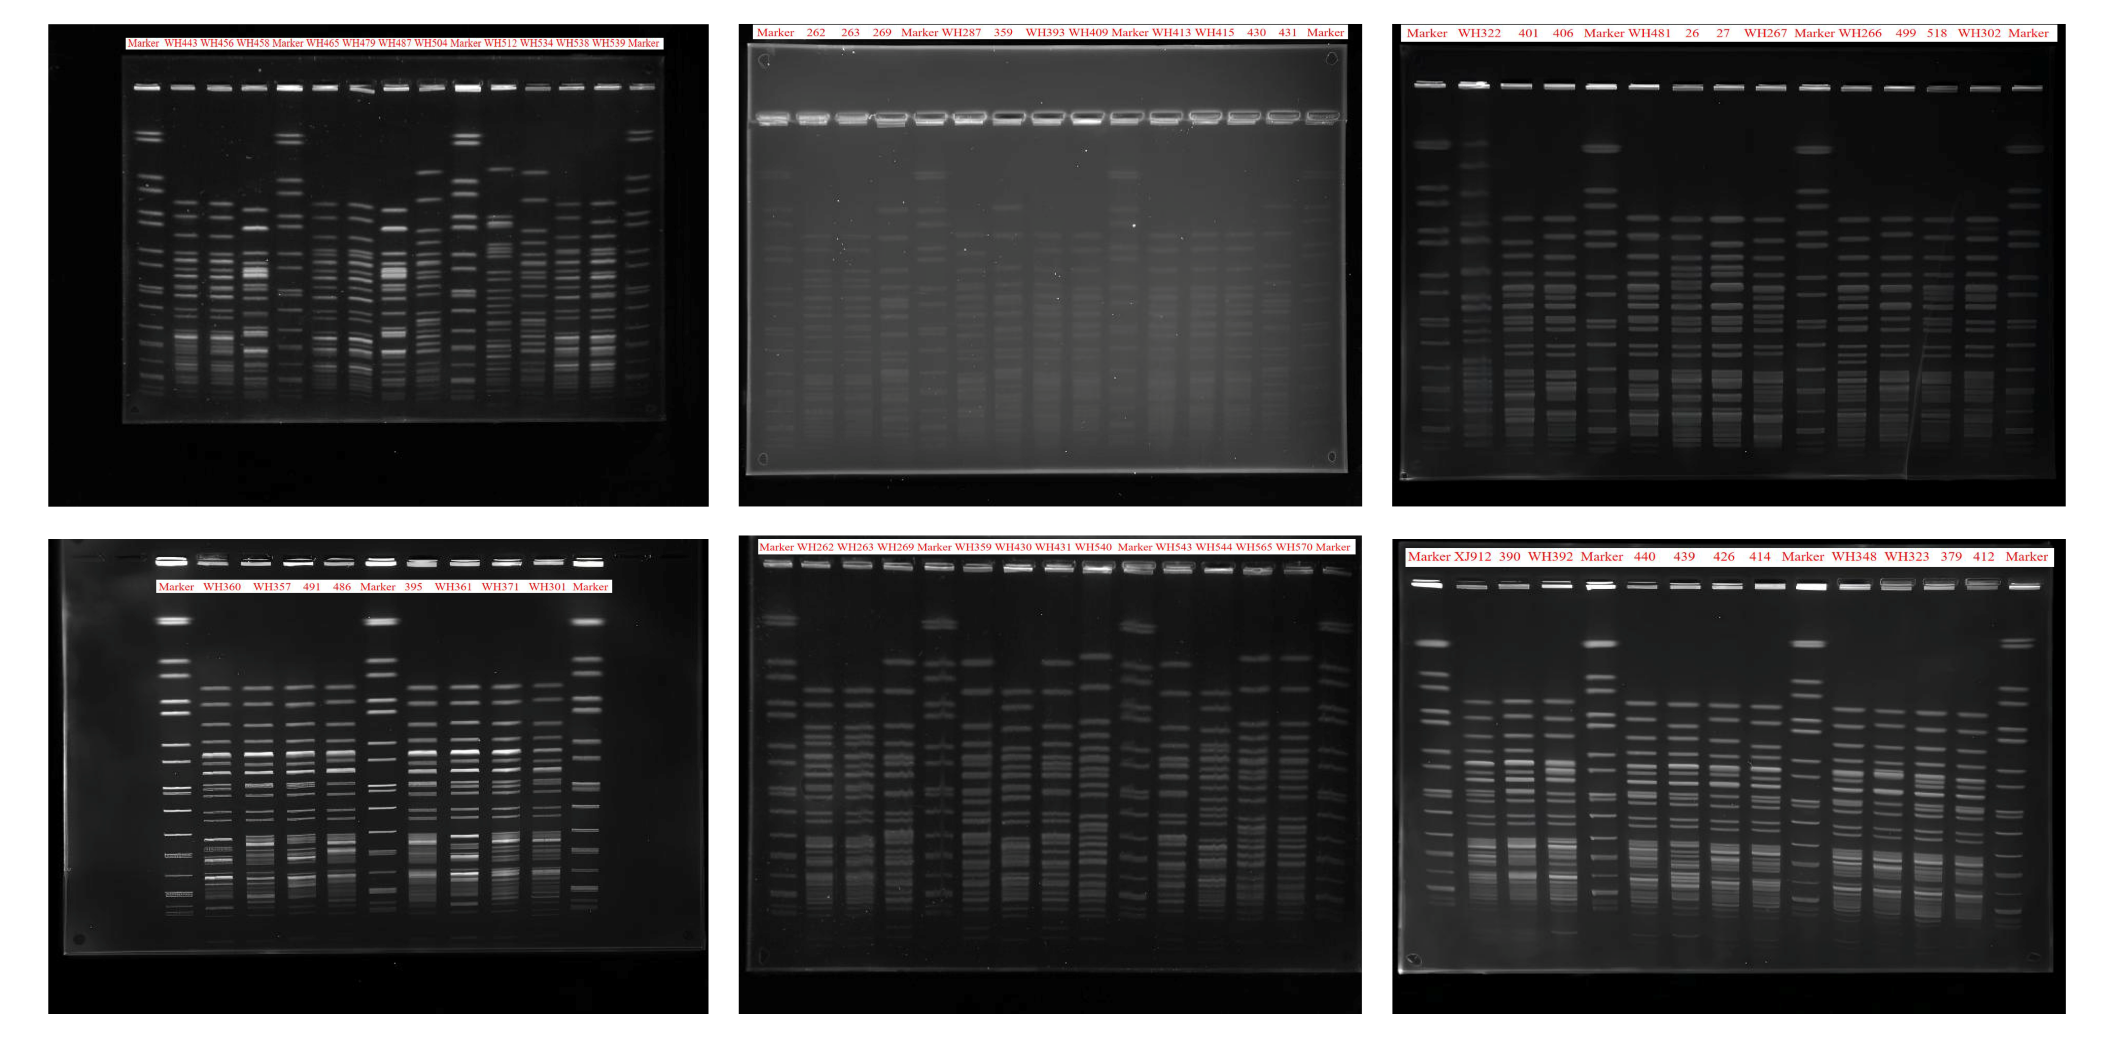


**Supplementary Figure S1** Original uncropped PFGE gel images used in the analysis of 40 *Shigella flexneri* isolates in this study (corresponding to Figure 3). Lanes unrelated to the present study were captured on the same gel and are retained for transparency, but are not part of the reported results.
